# Supplementary material for: Long-Term Storage and Longevity of Orthodox Seeds: A Systematic Review
Source: Front Plant Sci. 2020 Jul 3;11:1007. doi: 10.3389/fpls.2020.01007 (PMC7347988; doi:10.3389/fpls.2020.01007)
Supplement: Table S1 — Supplementary file with data from the meta-analysis showing all species, number of accessions per species, initial germination percentage, storage years, final germination percentage, average yearly changes in germination and observed/estimated P50 from each of the studies included. See text for explanation. [file Table_1.xlsx]

## Sheet: Ark1
Study Code	Row Code	Species	Accessions (n)	Wild/Cultivated	Storage Years	InitialGerm%	FinalGerm%	P50 years	DeltaGermYear	Method	Ref	Comment
CO_D	D16	Arachis hypogaea	54	C	22.35	91.96	63.07	28.51	1.29262	Genebank	Desheva 2016	Bulgarian genebank
CO_D	D1	Avena sativa	457	C	23.12	95.76	95.28	880	0.0207612	Genebank	Desheva 2016	Bulgarian genebank
CO_D	D20	Brassica napus	44	C	21.72	94.72	85.31	55.93	0.433241	Genebank	Desheva 2016	Bulgarian genebank
CO_D	D24	Brassica oleracea	48	C	22.64	89	81.85	87	0.315813	Genebank	Desheva 2016	Bulgarian genebank
CO_D	D10	Bromus inermis	37	C	21.13	89.83	87.83	323.5	0.0946522	Genebank	Desheva 2016	Bulgarian genebank
CO_D	D28	Capsicum annuum	30	C	21.43	90.66	87.13	132.72	0.164722	Genebank	Desheva 2016	Bulgarian genebank
CO_D	D15	Cicer arietinum	37	C	23.91	94.48	91.72	169.33	0.115433	Genebank	Desheva 2016	Bulgarian genebank
CO_D	D26	Cucumis sativus	68	C	22.91	99.26	97.94	72.53	0.0576168	Genebank	Desheva 2016	Bulgarian genebank
CO_D	D9	Dacylis glomerata	55	C	22.78	83.81	78.4	114	0.237489	Genebank	Desheva 2016	Bulgarian genebank
CO_D	D11	Festuca arundinacea	34	C	22.97	92.3	89.52	76.61	0.121027	Genebank	Desheva 2016	Bulgarian genebank
CO_D	D19	Glycine max	306	C	23.87	91.87	80.56	57.27	0.473817	Genebank	Desheva 2016	Bulgarian genebank
CO_D	D21	Helianthus annuus	53	C	23.07	91.92	90.54	72.15	0.0598179	Genebank	Desheva 2016	Bulgarian genebank
CO_D	D2	Hordeum vulgare	1195	C	22.78	93.22	91.99	502.7	0.0539947	Genebank	Desheva 2016	Bulgarian genebank
CO_D	D25	Lactuca sativa	177	C	22.37	85.18	72.4	145.44	0.571301	Genebank	Desheva 2016	Bulgarian genebank
CO_D	D14	Lathyrus sativus	65	W	23.75	94.81	87.67	79	0.300632	Genebank	Desheva 2016	Bulgarian genebank
CO_D	D17	Lens esculenta	56	C	23.62	95.25	90.03	98.38	0.220999	Genebank	Desheva 2016	Bulgarian genebank
CO_D	D23	Linum usitatisimum	67	C	23.22	96.71	89.13	68.42	0.326443	Genebank	Desheva 2016	Bulgarian genebank
CO_D	D27	Lycopersicon esculentum	63	C	23.51	92.5	84.04	48.76	0.359847	Genebank	Desheva 2016	Bulgarian genebank
CO_D	D22	Nicotiana tabacum	117	C	21.82	97.02	90.76	476	0.286893	Genebank	Desheva 2016	Bulgarian genebank
CO_D	D18	Phaseolus vulgaris	56	C	21.69	91.71	84.03	64.6	0.35408	Genebank	Desheva 2016	Bulgarian genebank
CO_D	D3	Secale cereale	35	C	23.48	94.57	83.68	55.85	0.463799	Genebank	Desheva 2016	Bulgarian genebank
CO_D	D4	Sorghum vulgare	99	C	24.13	91.39	83.63	82.67	0.321591	Genebank	Desheva 2016	Bulgarian genebank
CO_D	D7	Triticum aestivum	1547	C	23.03	95.51	94.97	847	0.0234477	Genebank	Desheva 2016	Bulgarian genebank
CO_D	D8	Triticum durum	389	C	27.29	95.37	92.58	186	0.102235	Genebank	Desheva 2016	Bulgarian genebank
CO_D	D12	Vicia faba	57	C	21.94	95.68	92.45	144.25	0.14722	Genebank	Desheva 2016	Bulgarian genebank
CO_D	D13	Vicia sativa	131	C	24.16	91.94	84.12	84.93	0.323675	Genebank	Desheva 2016	Bulgarian genebank
CO_D	D5	X Triticosecale	52	C	24	92	82.03	66.3	0.415417	Genebank	Desheva 2016	Bulgarian genebank
CO_D	D6	Zea mays	364	C	23.49	94.6	91.19	141	0.145168	Genebank	Desheva 2016	Bulgarian genebank
CO_S	S27	Abies procera	4	W	27	49	1	8	1.77778	Cool/cold, dry	Stanwood - see Walters 2005	USDA genebank, 5dg C and 4-8 internal seed humidity
CO_S	S25	Allium cepa	21	C	26	94	31	15	2.42308	Cool/cold, dry	Stanwood - see Walters 2005	USDA genebank, 5dg C and 4-8 internal seed humidity
CO_S	S1	Apium graveolens	2	C	26	90	76	75	0.538462	Cool/cold, dry	Stanwood - see Walters 2005	USDA genebank, 5dg C and 4-8 internal seed humidity
CO_S	S15	Astragalus sp.	3	W	27	93	88	81	0.185185	Cool/cold, dry	Stanwood - see Walters 2005	USDA genebank, 5dg C and 4-8 internal seed humidity
CO_S	S10	Beta vulgaris	10	C	26	91	87	88	0.153846	Cool/cold, dry	Stanwood - see Walters 2005	USDA genebank, 5dg C and 4-8 internal seed humidity
CO_S	S7	Brassica oleracea	18	C	26	95	40	25	2.11538	Cool/cold, dry	Stanwood - see Walters 2005	USDA genebank, 5dg C and 4-8 internal seed humidity
CO_S	S38	Capsicum annuum	3	C	27	98	76	44	0.814815	Cool/cold, dry	Stanwood - see Walters 2005	USDA genebank, 5dg C and 4-8 internal seed humidity
CO_S	S12	Citrullus lanatus	5	C	27	98	95	318	0.111111	Cool/cold, dry	Stanwood - see Walters 2005	USDA genebank, 5dg C and 4-8 internal seed humidity
CO_S	S8	Crambe abyssinica	4	W	27	74	48	21	0.962963	Cool/cold, dry	Stanwood - see Walters 2005	USDA genebank, 5dg C and 4-8 internal seed humidity
CO_S	S13	Cucumis melo	7	C	27	95	91	224	0.148148	Cool/cold, dry	Stanwood - see Walters 2005	USDA genebank, 5dg C and 4-8 internal seed humidity
CO_S	S14	Cucumis sativa	7	C	27	97	93	199	0.148148	Cool/cold, dry	Stanwood - see Walters 2005	USDA genebank, 5dg C and 4-8 internal seed humidity
CO_S	S2	Daucus carota	19	C	26	86	79	79	0.269231	Cool/cold, dry	Stanwood - see Walters 2005	USDA genebank, 5dg C and 4-8 internal seed humidity
CO_S	S28	Eragrostis curvula	3	W	26	94	82	85	0.461538	Cool/cold, dry	Stanwood - see Walters 2005	USDA genebank, 5dg C and 4-8 internal seed humidity
CO_S	S29	Festuca arundinacea	3	C	26	91	33	15	2.23077	Cool/cold, dry	Stanwood - see Walters 2005	USDA genebank, 5dg C and 4-8 internal seed humidity
CO_S	S30	Festuca rubra	3	C	26	92	41	37	1.96154	Cool/cold, dry	Stanwood - see Walters 2005	USDA genebank, 5dg C and 4-8 internal seed humidity
CO_S	S16	Glycine max	1	C	27	95	16	31	2.92593	Cool/cold, dry	Stanwood - see Walters 2005	USDA genebank, 5dg C and 4-8 internal seed humidity
CO_S	S4	Helianthus annuus	3	C	27	92	82	56	0.37037	Cool/cold, dry	Stanwood - see Walters 2005	USDA genebank, 5dg C and 4-8 internal seed humidity
CO_S	S31	Hordeum vulgare	3	C	26	97	73	58	0.923077	Cool/cold, dry	Stanwood - see Walters 2005	USDA genebank, 5dg C and 4-8 internal seed humidity
CO_S	S5	Lactuca sativa	9	C	26	98	13	23	3.26923	Cool/cold, dry	Stanwood - see Walters 2005	USDA genebank, 5dg C and 4-8 internal seed humidity
CO_S	S17	Lespedeza cuneata	1	W	30	92	7	10	2.83333	Cool/cold, dry	Stanwood - see Walters 2005	USDA genebank, 5dg C and 4-8 internal seed humidity
CO_S	S18	Lotus corniculatus	3	W	26	84	70	52	0.538462	Cool/cold, dry	Stanwood - see Walters 2005	USDA genebank, 5dg C and 4-8 internal seed humidity
CO_S	S39	Lycopersicon esculentum	6	C	26	92	89	130	0.115385	Cool/cold, dry	Stanwood - see Walters 2005	USDA genebank, 5dg C and 4-8 internal seed humidity
CO_S	S19	Medicago sativa	4	C	26	89	70	55	0.730769	Cool/cold, dry	Stanwood - see Walters 2005	USDA genebank, 5dg C and 4-8 internal seed humidity
CO_S	S40	Nicotiana tabacum	4	C	25	95	89	81	0.24	Cool/cold, dry	Stanwood - see Walters 2005	USDA genebank, 5dg C and 4-8 internal seed humidity
CO_S	S20	Onobrychis viciifolia	3	W	27	84	27	15	2.11111	Cool/cold, dry	Stanwood - see Walters 2005	USDA genebank, 5dg C and 4-8 internal seed humidity
CO_S	S32	Oryza sativa	2	C	32	98	13	22	2.65625	Cool/cold, dry	Stanwood - see Walters 2005	USDA genebank, 5dg C and 4-8 internal seed humidity
CO_S	S26	Papaver somniferum	3	W	44	99	51	43	1.09091	Cool/cold, dry	Stanwood - see Walters 2005	USDA genebank, 5dg C and 4-8 internal seed humidity
CO_S	S33	Pennisetum glaucum	1	C	27	87	63	25	0.888889	Cool/cold, dry	Stanwood - see Walters 2005	USDA genebank, 5dg C and 4-8 internal seed humidity
CO_S	S3	Petroselinum crispum	2	C	26	89	73	58	0.615385	Cool/cold, dry	Stanwood - see Walters 2005	USDA genebank, 5dg C and 4-8 internal seed humidity
CO_S	S41	Petunia sp.	6	W	25	93	58	26	1.4	Cool/cold, dry	Stanwood - see Walters 2005	USDA genebank, 5dg C and 4-8 internal seed humidity
CO_S	S21	Phaseolus vulgaris	3	C	26	93	96	307	-0.115385	Cool/cold, dry	Stanwood - see Walters 2005	USDA genebank, 5dg C and 4-8 internal seed humidity
CO_S	S34	Poa pratensis	3	C	26	90	87	154	0.115385	Cool/cold, dry	Stanwood - see Walters 2005	USDA genebank, 5dg C and 4-8 internal seed humidity
CO_S	S9	Raphanus sativus	8	C	27	99	97	497	0.0740741	Cool/cold, dry	Stanwood - see Walters 2005	USDA genebank, 5dg C and 4-8 internal seed humidity
CO_S	S35	Sorghum bicolor	7	C	26	97	90	125	0.269231	Cool/cold, dry	Stanwood - see Walters 2005	USDA genebank, 5dg C and 4-8 internal seed humidity
CO_S	S11	Spinacia oleracea	5	C	27	97	86	102	0.407407	Cool/cold, dry	Stanwood - see Walters 2005	USDA genebank, 5dg C and 4-8 internal seed humidity
CO_S	S22	Trifolium pratense	3	C	25	87	57	127	1.2	Cool/cold, dry	Stanwood - see Walters 2005	USDA genebank, 5dg C and 4-8 internal seed humidity
CO_S	S23	Trifolium repens	3	C	25	87	84	57	0.12	Cool/cold, dry	Stanwood - see Walters 2005	USDA genebank, 5dg C and 4-8 internal seed humidity
CO_S	S36	Triticum aestivum	3	C	40	95	26	40	1.725	Cool/cold, dry	Stanwood - see Walters 2005	USDA genebank, 5dg C and 4-8 internal seed humidity
CO_S	S42	Ulmus americana	1	W	28	90	1	10	3.17857	Cool/cold, dry	Stanwood - see Walters 2005	USDA genebank, 5dg C and 4-8 internal seed humidity
CO_S	S24	Vicia sp	3	C	26	94	91	133	0.115385	Cool/cold, dry	Stanwood - see Walters 2005	USDA genebank, 5dg C and 4-8 internal seed humidity
CO_S	S37	Zea mays	1	C	26	99	98	263	0.0384615	Cool/cold, dry	Stanwood - see Walters 2005	USDA genebank, 5dg C and 4-8 internal seed humidity
CO_S	S6	Zinnia violacea	4	C	24	88	42	20	1.91667	Cool/cold, dry	Stanwood - see Walters 2005	USDA genebank, 5dg C and 4-8 internal seed humidity
CO_R	R8	Abelmoschus esculentus	5	C	47	98	66	125	0.680851	Cool/cold, dry	Roos & Davidson 1995	USDA genebank, note initial germination set to 98%
CO_R	R9	Allium cepa	5	C	47	98	25	29	1.55319	Cool/cold, dry	Roos & Davidson 1995	USDA genebank, note initial germination set to 98%
CO_R	R2	Beta vulgaris	6	C	52	98	30	43	1.30769	Cool/cold, dry	Roos & Davidson 1995	USDA genebank, note initial germination set to 98%
CO_R	R13	Beta vulgaris var. Cicla	4	C	47	98	66	58	0.680851	Cool/cold, dry	Roos & Davidson 1995	USDA genebank, note initial germination set to 98%
CO_R	R11	Capsicum annuum	4	C	47	98	16	27	1.74468	Cool/cold, dry	Roos & Davidson 1995	USDA genebank, note initial germination set to 98%
CO_R	R15	Citrullus lanatus	5	C	56	98	32	43	1.17857	Cool/cold, dry	Roos & Davidson 1995	USDA genebank, note initial germination set to 98%
CO_R	R7	Cucumis melo	5	C	53	98	54	61	0.830189	Cool/cold, dry	Roos & Davidson 1995	USDA genebank, note initial germination set to 98%
CO_R	R5	Cucumis sativus	5	C	52	98	46	45	1	Cool/cold, dry	Roos & Davidson 1995	USDA genebank, note initial germination set to 98%
CO_R	R3	Daucus carota	5	C	44	98	32	35	1.5	Cool/cold, dry	Roos & Davidson 1995	USDA genebank, note initial germination set to 98%
CO_R	R14	Lycopersicon esculentum	5	C	57	98	76	124	0.385965	Cool/cold, dry	Roos & Davidson 1995	USDA genebank, note initial germination set to 98%
CO_R	R1	Phaseolus vulgaris	5	C	46	98	36	46	1.34783	Cool/cold, dry	Roos & Davidson 1995	USDA genebank, note initial germination set to 98%
CO_R	R10	Pisum sativum	3	C	50	98	75	130	0.46	Cool/cold, dry	Roos & Davidson 1995	USDA genebank, note initial germination set to 98%
CO_R	R6	Solanum melongena	4	C	52	98	35	54	1.21154	Cool/cold, dry	Roos & Davidson 1995	USDA genebank, note initial germination set to 98%
CO_R	R13	Spinacia oleracea	3	C	44	98	38	37	1.36364	Cool/cold, dry	Roos & Davidson 1995	USDA genebank, note initial germination set to 98%
CO_R	R4	Zea mays	5	C	47	98	69	65	0.617021	Cool/cold, dry	Roos & Davidson 1995	USDA genebank, note initial germination set to 98%
CO_W	W50	Abelmoschus esculentus	95	C	42	87	71	87	0.380952	Cool/cold, dry	Walters et al 2005	USDA genebank
CO_W	W58	Agropyron cristatum	75	W	38.8	92	77	65	0.386598	Cool/cold, dry	Walters et al 2005	USDA genebank
CO_W	W59	Agropyron desertorum	20	W	40.3	90	63	45	0.669975	Cool/cold, dry	Walters et al 2005	USDA genebank
CO_W	W60	Agropyron fragile	14	W	41.8	89	55	37	0.813397	Cool/cold, dry	Walters et al 2005	USDA genebank
CO_W	W46	Allium ampeloprasum	10	W	43.2	95	55	32	0.925926	Cool/cold, dry	Walters et al 2005	USDA genebank
CO_W	W47	Allium cepa	223	C	40.4	91	8	23	2.05446	Cool/cold, dry	Walters et al 2005	USDA genebank
CO_W	W48	Allium fistulosum	10	W	43	95	13	21	1.90698	Cool/cold, dry	Walters et al 2005	USDA genebank
CO_W	W1	Anethum graveolens	15	C	17.3	39	15	18	1.38728	Cool/cold, dry	Walters et al 2005	USDA genebank
CO_W	W2	Apium graveolens	111	C	37.8	87	33	27	1.42857	Cool/cold, dry	Walters et al 2005	USDA genebank
CO_W	W30	Arachis hypogaea	780	C	34	89	6	25	2.44118	Cool/cold, dry	Walters et al 2005	USDA genebank
CO_W	W61	Avena sativa	785	C	44.4	97	83	117	0.315315	Cool/cold, dry	Walters et al 2005	USDA genebank
CO_W	W19	Beta vulgaris	234	C	60.4	88	2	42	1.42384	Cool/cold, dry	Walters et al 2005	USDA genebank
CO_W	W14	Brassica juncea	29	W	43.7	97	55	59	0.961098	Cool/cold, dry	Walters et al 2005	USDA genebank
CO_W	W15	Brassica napus	12	C	37.2	94	26	25	1.82796	Cool/cold, dry	Walters et al 2005	USDA genebank
CO_W	W16	Brassica oleracea	370	C	39	91	11	23	2.05128	Cool/cold, dry	Walters et al 2005	USDA genebank
CO_W	W62	Bromus catharticus	35	W	41.8	97	20	23	1.84211	Cool/cold, dry	Walters et al 2005	USDA genebank
CO_W	W63	Bromus inermis	12	C	28.3	91	5	16	3.03887	Cool/cold, dry	Walters et al 2005	USDA genebank
CO_W	W85	Capsicum annuum	535	C	43.9	90	18	29	1.64009	Cool/cold, dry	Walters et al 2005	USDA genebank
CO_W	W86	Capsicum baccatum	18	C	32.8	93	0	24	2.83537	Cool/cold, dry	Walters et al 2005	USDA genebank
CO_W	W87	Capsicum chinense	51	C	37.2	93	72	48	0.564516	Cool/cold, dry	Walters et al 2005	USDA genebank
CO_W	W7	Carthamus tinctorius	1049	W	40.7	87	69	88	0.44226	Cool/cold, dry	Walters et al 2005	USDA genebank
CO_W	W3	Carum carvi	1	W	42.7	76	40	32	0.843091	Cool/cold, dry	Walters et al 2005	USDA genebank
CO_W	W8	Cichorium endive	17	W	43.2	91	63	55	0.648148	Cool/cold, dry	Walters et al 2005	USDA genebank
CO_W	W21	Citrullus lanatus	554	C	42.9	92	63	68	0.675991	Cool/cold, dry	Walters et al 2005	USDA genebank
CO_W	W17	Crambe abyssinica	92	W	34.5	86	43	21	1.24638	Cool/cold, dry	Walters et al 2005	USDA genebank
CO_W	W22	Cucumis melo	814	C	68.8	92	53	66	0.56686	Cool/cold, dry	Walters et al 2005	USDA genebank
CO_W	W23	Cucumis sativus	162	C	68.7	94	61	87	0.480349	Cool/cold, dry	Walters et al 2005	USDA genebank
CO_W	W24	Cucurbita argyrosperma	14	W	43.7	96	67	67	0.663616	Cool/cold, dry	Walters et al 2005	USDA genebank
CO_W	W25	Cucurbita maxima	209	C	43.5	94	63	50	0.712644	Cool/cold, dry	Walters et al 2005	USDA genebank
CO_W	W26	Cucurbita moschata	70	C	43.7	94	75	86	0.434783	Cool/cold, dry	Walters et al 2005	USDA genebank
CO_W	W27	Cucurbita pepo	104	C	42.8	94	76	76	0.420561	Cool/cold, dry	Walters et al 2005	USDA genebank
CO_W	W64	Dactylis glomerata	317	C	43.8	88	61	65	0.616438	Cool/cold, dry	Walters et al 2005	USDA genebank
CO_W	W88	Datura metel	17	W	36.9	91	26	14	1.76152	Cool/cold, dry	Walters et al 2005	USDA genebank
CO_W	W89	Datura stramonium	142	W	36.8	94	82	104	0.326087	Cool/cold, dry	Walters et al 2005	USDA genebank
CO_W	W4	Daucus carota	100	C	45.8	85	9	30	1.65939	Cool/cold, dry	Walters et al 2005	USDA genebank
CO_W	W65	Eleusine coracana	658	C	29.8	87	87	437	0	Cool/cold, dry	Walters et al 2005	USDA genebank
CO_W	W66	Elymus trachycaulus	33	W	22	94	2	14	4.18182	Cool/cold, dry	Walters et al 2005	USDA genebank
CO_W	W67	Elymus transhyrcanus	24	W	30.4	89	86	178	0.0986842	Cool/cold, dry	Walters et al 2005	USDA genebank
CO_W	W68	Eragrostis curvula	62	W	28.7	97	65	44	1.11498	Cool/cold, dry	Walters et al 2005	USDA genebank
CO_W	W69	Eragrostis tef (abyssinica)	22	W	16.7	96	91	66	0.299401	Cool/cold, dry	Walters et al 2005	USDA genebank
CO_W	W84	Fagopyrum esculentum	106	C	40.5	91	52	40	0.962963	Cool/cold, dry	Walters et al 2005	USDA genebank
CO_W	W70	Festuca arundinacea (elatior)	61	C	29.2	92	36	25	1.91781	Cool/cold, dry	Walters et al 2005	USDA genebank
CO_W	W71	Festuca rubra	112	C	29	92	33	25	2.03448	Cool/cold, dry	Walters et al 2005	USDA genebank
CO_W	W32	Glycine max	3635	C	35.9	92	21	32	1.97772	Cool/cold, dry	Walters et al 2005	USDA genebank
CO_W	W51	Gossypium barbadense	197	C	41.6	97	87	141	0.240385	Cool/cold, dry	Walters et al 2005	USDA genebank
CO_W	W52	Gossypium hirsutum	1395	C	60.6	95	60	115	0.577558	Cool/cold, dry	Walters et al 2005	USDA genebank
CO_W	W53	Gossypium hybrid	18	C	32.5	96	41	28	1.69231	Cool/cold, dry	Walters et al 2005	USDA genebank
CO_W	W9	Helianthus annuus	36	C	49.9	92	42	50	1.002	Cool/cold, dry	Walters et al 2005	USDA genebank
CO_W	W54	Hibiscus cannabinus	94	W	39.5	89	66	59	0.582278	Cool/cold, dry	Walters et al 2005	USDA genebank
CO_W	W55	Hibiscus sabdariffa	46	W	39.5	83	78	385	0.126582	Cool/cold, dry	Walters et al 2005	USDA genebank
CO_W	W72	Hordeum vulgare	941	C	44.4	97	86	84	0.247748	Cool/cold, dry	Walters et al 2005	USDA genebank
CO_W	W10	Lactuca sativa	499	C	39.1	97	2	23	2.42967	Cool/cold, dry	Walters et al 2005	USDA genebank
CO_W	W28	Lagenaria siceraria	21	W	38.5	93	59	56	0.883117	Cool/cold, dry	Walters et al 2005	USDA genebank
CO_W	W32	Lathyrus odoratus	23	W	41.9	91	58	40	0.787589	Cool/cold, dry	Walters et al 2005	USDA genebank
CO_W	W33	Lens culinaris	1727	C	34.8	95	91	365	0.114943	Cool/cold, dry	Walters et al 2005	USDA genebank
CO_W	W49	Linum usitatissimum	2038	C	43.5	93	64	53	0.666667	Cool/cold, dry	Walters et al 2005	USDA genebank
CO_W	W73	Lolium multiflorum	28	C	41.5	91	56	43	0.843373	Cool/cold, dry	Walters et al 2005	USDA genebank
CO_W	W74	Lolium perenne	114	C	40.8	95	46	41	1.20098	Cool/cold, dry	Walters et al 2005	USDA genebank
CO_W	W75	Lolium rigidum	13	W	36.9	87	75	82	0.325203	Cool/cold, dry	Walters et al 2005	USDA genebank
CO_W	W34	Lotus corniculatus	224	W	42.3	92	69	68	0.543735	Cool/cold, dry	Walters et al 2005	USDA genebank
CO_W	W90	Lycopersicon esculentum	3749	C	80.6	92	28	73	0.794045	Cool/cold, dry	Walters et al 2005	USDA genebank
CO_W	W35	Medicago sativa	423	C	49.8	92	80	93	0.240964	Cool/cold, dry	Walters et al 2005	USDA genebank
CO_W	W36	Melilotus alba	13	C	42.5	89	65	63	0.564706	Cool/cold, dry	Walters et al 2005	USDA genebank
CO_W	W91	Nicotiana tabacum	829	C	45.7	91	13	31	1.70678	Cool/cold, dry	Walters et al 2005	USDA genebank
CO_W	W37	Onobrychis viciifolia	41	W	42.1	92	40	34	1.23515	Cool/cold, dry	Walters et al 2005	USDA genebank
CO_W	W76	Oryza sativa	84	C	28.2	90	54	34	1.2766	Cool/cold, dry	Walters et al 2005	USDA genebank
CO_W	W56	Papaver somniferum	48	W	39	95	75	62	0.512821	Cool/cold, dry	Walters et al 2005	USDA genebank
CO_W	W5	Pastinaca sativa	11	C	26.7	85	22	30	2.35955	Cool/cold, dry	Walters et al 2005	USDA genebank
CO_W	W77	Pennisetum glaucum	13	C	26.3	83	56	35	1.02662	Cool/cold, dry	Walters et al 2005	USDA genebank
CO_W	W6	Petroselinum crispum	22	C	34.3	85	26	21	1.72012	Cool/cold, dry	Walters et al 2005	USDA genebank
CO_W	W38	Phaseolus vulgaris	2471	C	43.9	91	13	31	1.77677	Cool/cold, dry	Walters et al 2005	USDA genebank
CO_W	W78	Phleum pratense	126	C	39.1	95	43	32	1.32992	Cool/cold, dry	Walters et al 2005	USDA genebank
CO_W	W39	Pisum sativum	1068	C	63.9	95	70	97	0.391236	Cool/cold, dry	Walters et al 2005	USDA genebank
CO_W	W79	Poa pratensis	84	C	42.3	86	63	54	0.543735	Cool/cold, dry	Walters et al 2005	USDA genebank
CO_W	W18	Raphanus sativus	70	C	43.9	97	85	120	0.273349	Cool/cold, dry	Walters et al 2005	USDA genebank
CO_W	W29	Ricinus communis	174	W	37.3	86	24	26	1.6622	Cool/cold, dry	Walters et al 2005	USDA genebank
CO_W	W80	Secale cereale	28	C	43.7	93	46	36	1.07551	Cool/cold, dry	Walters et al 2005	USDA genebank
CO_W	W57	Sesamum indicum	250	C	42.8	93	49	39	1.02804	Cool/cold, dry	Walters et al 2005	USDA genebank
CO_W	W92	Solanum melongena	255	C	51.4	88	43	46	0.875486	Cool/cold, dry	Walters et al 2005	USDA genebank
CO_W	W93	Solanum tuberosum	159	C	24	96	39	22	2.375	Cool/cold, dry	Walters et al 2005	USDA genebank
CO_W	W81	Sorghum bicolor	8220	C	44.4	89	36	53	1.19369	Cool/cold, dry	Walters et al 2005	USDA genebank
CO_W	W20	Spinacia oleracea	51	C	64.7	92	53	73	0.602782	Cool/cold, dry	Walters et al 2005	USDA genebank
CO_W	W11	Tagetes patula	11	C	25.5	93	32	22	2.39216	Cool/cold, dry	Walters et al 2005	USDA genebank
CO_W	W12	Tagetes patula	38	C	46.2	90	52	43	0.822511	Cool/cold, dry	Walters et al 2005	USDA genebank
CO_W	W40	Trifolium alexandrinum	10	W	43.3	90	74	70	0.369515	Cool/cold, dry	Walters et al 2005	USDA genebank
CO_W	W41	Trifolium fragiferum	59	W	43.7	93	90	196	0.0686499	Cool/cold, dry	Walters et al 2005	USDA genebank
CO_W	W42	Trifolium hybridum	45	C	37.6	96	41	29	1.46277	Cool/cold, dry	Walters et al 2005	USDA genebank
CO_W	W43	Trifolium pratense	558	C	40.5	88	47	43	1.01235	Cool/cold, dry	Walters et al 2005	USDA genebank
CO_W	W44	Trifolium repens	261	C	43.5	91	71	77	0.45977	Cool/cold, dry	Walters et al 2005	USDA genebank
CO_W	W82	Triticum aestivum	427	C	43.6	94	73	54	0.481651	Cool/cold, dry	Walters et al 2005	USDA genebank
CO_W	W45	Vigna radiata	181	C	40.5	93	92	457	0.0246914	Cool/cold, dry	Walters et al 2005	USDA genebank
CO_W	W83	Zea mays	2272	C	60.7	96	28	49	1.12026	Cool/cold, dry	Walters et al 2005	USDA genebank
CO_W	W13	Zinnia violacea	12	C	41.8	86	45	70	0.980861	Cool/cold, dry	Walters et al 2005	USDA genebank
AM_N	N14	Allium schoenoprasum		C				2		Ambient	Nagel and Börner 2010
AM_N	N1	Avena sativa		C				7.8		Ambient	Nagel and Börner 2010
AM_N	N10	Brassica oleracea		C				7.3		Ambient	Nagel and Börner 2010
AM_N	N15	Cucurmis sativum		C				14.9		Ambient	Nagel and Börner 2010
AM_N	N16	Daucus carota		C				6.1		Ambient	Nagel and Börner 2010
AM_N	N11	Helianthus annuus		C				4.3		Ambient	Nagel and Börner 2010
AM_N	N2	Hordeum vulgare		C				9.2		Ambient	Nagel and Börner 2010
AM_N	N17	Lactuca sativa		C				4.6		Ambient	Nagel and Börner 2010
AM_N	N12	Linum usitatissimum		C				10.4		Ambient	Nagel and Börner 2010
AM_N	N6	Lupinus albus		C				13.5		Ambient	Nagel and Börner 2010
AM_N	N13	Papaver somniferum		W				8.2		Ambient	Nagel and Börner 2010
AM_N	N7	Phaseolus vulgaris		C				9.8		Ambient	Nagel and Börner 2010
AM_N	N8	Pisum sativum		C				13.9		Ambient	Nagel and Börner 2010
AM_N	N3	Secale cereale		C				5.9		Ambient	Nagel and Börner 2010
AM_N	N9	Vicia sativa		C				10.8		Ambient	Nagel and Börner 2010
AM_N	N4	X Triticosecale		C				5.9		Ambient	Nagel and Börner 2010
AM_N	N5	Zea mays		C				12.3		Ambient	Nagel and Börner 2010
AM_P	P19	Allium ampeloprasum		W				5.3		Ambient	Priestley et al 1985	Data from different sources
AM_P	P7	Allium cepa		C				5.43		Ambient	Priestley et al 1985	Data from different sources
AM_P	P8	Apium graveolens		C				4.11		Ambient	Priestley et al 1985	Data from different sources
AM_P	P48	Avena sativa		C				12.96		Ambient	Priestley et al 1985	Data from different sources
AM_P	P49	Beta vulgaris		C				16.51		Ambient	Priestley et al 1985	Data from different sources
AM_P	P50	Brassica hirta		W				13.71		Ambient	Priestley et al 1985	Data from different sources
AM_P	P1	Brassica napus		C				13.94		Ambient	Priestley et al 1985	Data from different sources
AM_P	P9	Brassica oleracea		C				7.15		Ambient	Priestley et al 1985	Data from different sources
AM_P	P10	Bromus inermis		C				3.38		Ambient	Priestley et al 1985	Data from different sources
AM_P	P11	Carum carvi		W				4.19		Ambient	Priestley et al 1985	Data from different sources
AM_P	P51	Cicer arietinum		C				15.29		Ambient	Priestley et al 1985	Data from different sources
AM_P	P27	Cichorium intybus		W				5.42		Ambient	Priestley et al 1985	Data from different sources
AM_P	P43	Cucumis sativus		C				4.92		Ambient	Priestley et al 1985	Data from different sources
AM_P	P28	Dactylis glomerata		C				6.61		Ambient	Priestley et al 1985	Data from different sources
AM_P	P2	Daucus carota		C				6.63		Ambient	Priestley et al 1985	Data from different sources
AM_P	P29	Fagopyrum esculentum		C				7.46		Ambient	Priestley et al 1985	Data from different sources
AM_P	P12	Festuca arundinacea		C				4.98		Ambient	Priestley et al 1985	Data from different sources
AM_P	P13	Festuca rubra		C				4.7		Ambient	Priestley et al 1985	Data from different sources
AM_P	P14	Glycine max		C				3.43		Ambient	Priestley et al 1985	Data from different sources
AM_P	P30	Helianthus annuus		C				5.42		Ambient	Priestley et al 1985	Data from different sources
AM_P	P44	Hordeum vulgare		C				7.19		Ambient	Priestley et al 1985	Data from different sources
AM_P	P3	Isatis tinctoria		W				9.82		Ambient	Priestley et al 1985	Data from different sources
AM_P	P15	Lactuca sativa		C				6.42		Ambient	Priestley et al 1985	Data from different sources
AM_P	P45	Lathyrus odoratus		W				13.63		Ambient	Priestley et al 1985	Data from different sources
AM_P	P52	Lens culinaris		C				10.65		Ambient	Priestley et al 1985	Data from different sources
AM_P	P20	Lepidium sativum		W				5.09		Ambient	Priestley et al 1985	Data from different sources
AM_P	P31	Linum usitatissimum		C				8.75		Ambient	Priestley et al 1985	Data from different sources
AM_P	P32	Lolium multiflorum		C				9.36		Ambient	Priestley et al 1985	Data from different sources
AM_P	P33	Lolium perenne		C				7.19		Ambient	Priestley et al 1985	Data from different sources
AM_P	P34	Lotus corniculatus		W				6.72		Ambient	Priestley et al 1985	Data from different sources
AM_P	P21	Lupinus angustifolius		C				3.81		Ambient	Priestley et al 1985	Data from different sources
AM_P	P46	Lupinus polyphyllus		W				6.2		Ambient	Priestley et al 1985	Data from different sources
AM_P	P53	Lycopersicon esculentum		C				24.52		Ambient	Priestley et al 1985	Data from different sources
AM_P	P54	Medicago sativa		C				10.56		Ambient	Priestley et al 1985	Data from different sources
AM_P	P47	Melilotus alba		C				33.4		Ambient	Priestley et al 1985	Data from different sources
AM_P	P4	Nicotiana tabacum		C				10.3		Ambient	Priestley et al 1985	Data from different sources
AM_P	P16	Onobrychis viciifolia		W				6.43		Ambient	Priestley et al 1985	Data from different sources
AM_P	P55	Panicum miliaceum		C				11.9		Ambient	Priestley et al 1985	Data from different sources
AM_P	P35	Papaver somniferum		W				7.28		Ambient	Priestley et al 1985	Data from different sources
AM_P	P17	Pastinaca sativa		C				4.04		Ambient	Priestley et al 1985	Data from different sources
AM_P	P18	Petroselinum crispum		C				3.41		Ambient	Priestley et al 1985	Data from different sources
AM_P	P5	Phaseolus vulgaris		C				15.97		Ambient	Priestley et al 1985	Data from different sources
AM_P	P36	Phleum pratense		C				5.73		Ambient	Priestley et al 1985	Data from different sources
AM_P	P56	Pisum sativum		C				15.86		Ambient	Priestley et al 1985	Data from different sources
AM_P	P37	Poa pratensis		C				6.63		Ambient	Priestley et al 1985	Data from different sources
AM_P	P57	Raphanus sativus		C				13.82		Ambient	Priestley et al 1985	Data from different sources
AM_P	P38	Rheum X hybridum		C				8.68		Ambient	Priestley et al 1985	Data from different sources
AM_P	P6	Ricinus communis		W				13.31		Ambient	Priestley et al 1985	Data from different sources
AM_P	P39	Scorzonera hispanica		W				6.74		Ambient	Priestley et al 1985	Data from different sources
AM_P	P22	Secale cereale		C				4.51		Ambient	Priestley et al 1985	Data from different sources
AM_P	P23	Solanum tuberosum		C				9		Ambient	Priestley et al 1985	Data from different sources
AM_P	P58	Spinacia oleracea		C				12.76		Ambient	Priestley et al 1985	Data from different sources
AM_P	P24	Tragopogon porrifolius		W				2.58		Ambient	Priestley et al 1985	Data from different sources
AM_P	P25	Trifolium hybridum		C				6.16		Ambient	Priestley et al 1985	Data from different sources
AM_P	P40	Trifolium incarnatum		W				5.25		Ambient	Priestley et al 1985	Data from different sources
AM_P	P41	Trifolium pratense		C				5.36		Ambient	Priestley et al 1985	Data from different sources
AM_P	P59	Trifolium repens		C				8.21		Ambient	Priestley et al 1985	Data from different sources
AM_P	P42	Triticum aestivum		C				7.59		Ambient	Priestley et al 1985	Data from different sources
AM_P	P26	Valerianella locusta		W				6.74		Ambient	Priestley et al 1985	Data from different sources
AM_P	P60	Vicia sp		C				11.4		Ambient	Priestley et al 1985	Data from different sources
AM_P	P61	Vigna radiata		C				19.54		Ambient	Priestley et al 1985	Data from different sources
AM_P	P62	Zea mays		C				9.6		Ambient	Priestley et al 1985	Data from different sources
