# Supplementary material for: Long-Term Storage and Longevity of Orthodox Seeds: A Systematic Review
Source: Front Plant Sci. 2020 Jul 3;11:1007. doi: 10.3389/fpls.2020.01007 (PMC7347988; doi:10.3389/fpls.2020.01007)
Supplement: Table S2 — Supplementary file with predicted final germination data from the Seed Information Database from RBG Kew compared to observed final germination data from the given long-term studies included in our meta-analysis. See text for explanation. [file Table_2.xlsx]

## Sheet: Ark1
Row Code	Code	Species	Pred equ MC	Accessions (n)	InitialGerm%	Finalgerm%	SIDPred_FinalGerm%
D16	CO_D	Arachis hypogaea	3.4	54	91.96	63.07	90.61
D20	CO_D	Brassica napus	4.1	44	94.72	85.31	94.35
D15	CO_D	Cicer arietinum	6	37	94.48	91.72	94.21
D19	CO_D	Glycine max	5	306	91.87	80.56	89.96
D21	CO_D	Helianthus annuus	4	53	91.92	90.54	88.89
D2	CO_D	Hordeum vulgare	6.1	1195	93.22	91.99	92.76
D25	CO_D	Lactuca sativa	4.2	177	85.18	72.4	83.64
D23	CO_D	Linum usitatisimum	3.9	67	96.71	89.13	96.4
D18	CO_D	Phaseolus vulgaris	6.2	56	91.71	84.03	91.5
D7	CO_D	Triticum aestivum	5.7	1547	95.51	94.97	95.21
D8	CO_D	Triticum durum	5.7	389	95.37	92.58	95
D6	CO_D	Zea mays	6	364	94.6	91.19	93.97
S25	CO_S	Allium cepa	5.1	21	94	31	91.96
S10	CO_S	Beta vulgaris	5.9	10	91	87	89.79
S13	CO_S	Cucumis melo	4.2	7	95	91	93.14
S16	CO_S	Glycine max	5	1	95	16	90.78
S4	CO_S	Helianthus annuus	4	3	92	82	70.68
S31	CO_S	Hordeum vulgare	6.1	3	97	73	95.73
S5	CO_S	Lactuca sativa	4.2	9	98	13	96.27
S32	CO_S	Oryza sativa	6.1	2	98	13	95.71
S33	CO_S	Pennisetum glaucum	5.9	1	87	63	83.45
S21	CO_S	Phaseolus vulgaris	6.2	3	93	93	92.03
S35	CO_S	Sorghum bicolor	6	7	97	90	96.77
S36	CO_S	Triticum aestivum	5.7	3	95	26	92.24
S37	CO_S	Zea mays	6	1	99	98	98.11
W47	CO_W	Allium cepa	5.1	223	91	8	73.46
W30	CO_W	Arachis hypogaea	3.4	780	89	6	75.64
W19	CO_W	Beta vulgaris	5.9	234	88	2	84.37
W14	CO_W	Brassica juncea	4.2	29	97	55	94.53
W15	CO_W	Brassica napus	4.1	12	94	26	90.65
W22	CO_W	Cucumis melo	4.2	814	92	53	84.12
W27	CO_W	Cucurbita pepo	4.1	104	94	76	85.36
W32	CO_W	Glycine max	5	3635	92	21	83.7
W52	CO_W	Gossypium hirsutum	3.9	1395	95	60	94.75
W9	CO_W	Helianthus annuus	4	36	92	42	42.49
W72	CO_W	Hordeum vulgare	6.1	941	97	86	94.55
W10	CO_W	Lactuca sativa	4.2	499	97	2	92.55
W49	CO_W	Linum usitatissimum	3.9	2038	93	64	87.76
W76	CO_W	Oryza sativa	6.1	84	90	54	83.83
W38	CO_W	Phaseolus vulgaris	6.2	2471	91	13	88.96
W78	CO_W	Phleum pratense	6	126	95	43	94.15
W39	CO_W	Pisum sativum	6.2	1068	95	70	93.99
W57	CO_W	Sesamum indicum	3.2	250	93	49	90.3
W81	CO_W	Sorghum bicolor	6	8220	89	36	87.94
W82	CO_W	Triticum aestivum	5.7	427	94	73	90.47
W83	CO_W	Zea mays	6	2272	96	28	87.84
