# Supplementary material for: Long-Term Storage and Longevity of Orthodox Seeds: A Systematic Review
Source: Front Plant Sci. 2020 Jul 3;11:1007. doi: 10.3389/fpls.2020.01007 (PMC7347988; doi:10.3389/fpls.2020.01007)
Supplement: Table S3 — Supplementary file with data for the different terminal nodes in the tree regression analysis (last column). Species information, number of accessions per species, initial germination percentage, storage years, final germination percentage, average yearly changes in germination and observed/estimated P50 from each of the studies included. See text for explanation. [file Table_3.xlsx]

## Sheet: P50 (1)
OrgID	Code	W_C_code	Wld_Cult	Species	Storage Years	Accession (n)	InitialGerm (%)	FinalGerm (%)	P50 (years)	DeltaGermYear%	InitialGerm/FinalGerm	P50/FinalGerm	Node
D16	CO_D	C_CO_D	C	Arachis hypogaea	22.35	54	91.96	63.07	28.51	1.29	1.70296	1.45806	4
S16	CO_S	C_CO_S	C	Glycine max	27	1	95	16	31	2.93	95	5.9375	4
S22	CO_S	C_CO_S	C	Trifolium pratense	25	3	87	57	127	1.2	29	1.52632	4
S25	CO_S	C_CO_S	C	Allium cepa	26	21	94	31	15	2.42	4.47619	3.03226	4
S29	CO_S	C_CO_S	C	Festuca arundinacea	26	3	91	33	15	2.23	30.3333	2.75758	4
S30	CO_S	C_CO_S	C	Festuca rubra	26	3	92	41	37	1.96	30.6667	2.2439	4
S31	CO_S	C_CO_S	C	Hordeum vulgare	26	3	97	73	58	0.92	32.3333	1.32877	4
S32	CO_S	C_CO_S	C	Oryza sativa	32	2	98	13	22	2.66	49	7.53846	4
S33	CO_S	C_CO_S	C	Pennisetum glaucum	27	1	87	63	25	0.89	87	1.38095	4
S36	CO_S	C_CO_S	C	Triticum aestivum	40	3	95	26	40	1.73	31.6667	3.65385	4
S38	CO_S	C_CO_S	C	Capsicum annuum	27	3	98	76	44	0.81	32.6667	1.28947	4
S5	CO_S	C_CO_S	C	Lactuca sativa	26	9	98	13	23	3.27	10.8889	7.53846	4
S6	CO_S	C_CO_S	C	Zinnia violacea	24	4	88	42	20	1.92	22	2.09524	4
S7	CO_S	C_CO_S	C	Brassica oleracea	26	18	95	40	25	2.12	5.27778	2.375	4
R1	CO_R	C_CO_R	C	Phaseolus vulgaris	46	5	98	36	46	1.35	19.6	2.72222	4
R11	CO_R	C_CO_R	C	Capsicum annuum	47	4	98	16	27	1.74	24.5	6.125	4
R13	CO_R	C_CO_R	C	Spinacia oleracea	44	3	98	38	37	1.36	32.6667	2.57895	4
R15	CO_R	C_CO_R	C	Citrullus lanatus	56	5	98	32	43	1.18	19.6	3.0625	4
R2	CO_R	C_CO_R	C	Beta vulgaris	52	6	98	30	43	1.31	16.3333	3.26667	4
R3	CO_R	C_CO_R	C	Daucus carota	44	5	98	32	35	1.5	19.6	3.0625	4
R5	CO_R	C_CO_R	C	Cucumis sativus	52	5	98	46	45	1	19.6	2.13043	4
R6	CO_R	C_CO_R	C	Solanum melongena	52	4	98	35	54	1.21	24.5	2.8	4
R7	CO_R	C_CO_R	C	Cucumis melo	53	5	98	54	61	0.83	19.6	1.81481	4
R9	CO_R	C_CO_R	C	Allium cepa	47	5	98	25	29	1.55	19.6	3.92	4
W1	CO_W	C_CO_W	C	Anethum graveolens	17.3	15	39	15	18	1.39	2.6	2.6	4
W10	CO_W	C_CO_W	C	Lactuca sativa	39.1	499	97	2	23	2.43	0.194389	48.5	4
W11	CO_W	C_CO_W	C	Tagetes patula	25.5	11	93	32	22	2.39	8.45455	2.90625	4
W12	CO_W	C_CO_W	C	Tagetes patula	46.2	38	90	52	43	0.82	2.36842	1.73077	4
W13	CO_W	C_CO_W	C	Zinnia violacea	41.8	12	86	45	70	0.98	7.16667	1.91111	4
W15	CO_W	C_CO_W	C	Brassica napus	37.2	12	94	26	25	1.83	7.83333	3.61538	4
W16	CO_W	C_CO_W	C	Brassica oleracea	39	370	91	11	23	2.05	0.245946	8.27273	4
W19	CO_W	C_CO_W	C	Beta vulgaris	60.4	234	88	2	42	1.42	0.376068	44	4
W2	CO_W	C_CO_W	C	Apium graveolens	37.8	111	87	33	27	1.43	0.783784	2.63636	4
W30	CO_W	C_CO_W	C	Arachis hypogaea	34	780	89	6	25	2.44	0.114103	14.8333	4
W31	CO_W	C_CO_W	C	Glycine max	35.9	3635	92	21	32	1.98	0.0253095	4.38095	4
W38	CO_W	C_CO_W	C	Phaseolus vulgaris	43.9	2471	91	13	31	1.78	0.0368272	7	4
W4	CO_W	C_CO_W	C	Daucus carota	45.8	100	85	9	30	1.66	0.85	9.44444	4
W42	CO_W	C_CO_W	C	Trifolium hybridum	37.6	45	96	41	29	1.46	2.13333	2.34146	4
W43	CO_W	C_CO_W	C	Trifolium pratense	40.5	558	88	47	43	1.01	0.157706	1.87234	4
W47	CO_W	C_CO_W	C	Allium cepa	40.4	223	91	8	23	2.05	0.408072	11.375	4
W5	CO_W	C_CO_W	C	Pastinaca sativa	26.7	11	85	22	30	2.36	7.72727	3.86364	4
W53	CO_W	C_CO_W	C	Gossypium hybrid	32.5	18	96	41	28	1.69	5.33333	2.34146	4
W57	CO_W	C_CO_W	C	Sesamum indicum	42.8	250	93	49	39	1.03	0.372	1.89796	4
W6	CO_W	C_CO_W	C	Petroselinum crispum	34.3	22	85	26	21	1.72	3.86364	3.26923	4
W63	CO_W	C_CO_W	C	Bromus inermis	28.3	12	91	5	16	3.04	7.58333	18.2	4
W70	CO_W	C_CO_W	C	Festuca arundinacea (elatior)	29.2	61	92	36	25	1.92	1.5082	2.55556	4
W71	CO_W	C_CO_W	C	Festuca rubra	29	112	92	33	25	2.03	0.821429	2.78788	4
W73	CO_W	C_CO_W	C	Lolium multiflorum	41.5	28	91	56	43	0.84	3.25	1.625	4
W74	CO_W	C_CO_W	C	Lolium perenne	40.8	114	95	46	41	1.2	0.833333	2.06522	4
W76	CO_W	C_CO_W	C	Oryza sativa	28.2	84	90	54	34	1.28	1.07143	1.66667	4
W77	CO_W	C_CO_W	C	Pennisetum glaucum	26.3	13	83	56	35	1.03	6.38462	1.48214	4
W78	CO_W	C_CO_W	C	Phleum pratense	39.1	126	95	43	32	1.33	0.753968	2.2093	4
W80	CO_W	C_CO_W	C	Secale cereale	43.7	28	93	46	36	1.08	3.32143	2.02174	4
W81	CO_W	C_CO_W	C	Sorghum bicolor	44.4	8220	89	36	53	1.19	0.0108273	2.47222	4
W83	CO_W	C_CO_W	C	Zea mays	60.7	2272	96	28	49	1.12	0.0422535	3.42857	4
W84	CO_W	C_CO_W	C	Fagopyrum esculentum	40.5	106	91	52	40	0.96	0.858491	1.75	4
W85	CO_W	C_CO_W	C	Capsicum annuum	43.9	535	90	18	29	1.64	0.168224	5	4
W86	CO_W	C_CO_W	C	Capsicum baccatum	32.8	18	93	NA	24	2.84	5.16667	NA	4
W9	CO_W	C_CO_W	C	Helianthus annuus	49.9	36	92	42	50	1	2.55556	2.19048	4
W91	CO_W	C_CO_W	C	Nicotiana tabacum	45.7	829	91	13	31	1.71	0.109771	7	4
W92	CO_W	C_CO_W	C	Solanum melongena	51.4	255	88	43	46	0.88	0.345098	2.04651	4
W93	CO_W	C_CO_W	C	Solanum tuberosum	24	159	96	39	22	2.38	0.603774	2.46154	4
S17	CO_S	W_CO_S	W	Lespedeza cuneata	30	1	92	7	10	2.83	92	13.1429	4
S20	CO_S	W_CO_S	W	Onobrychis viciifolia	27	3	84	27	15	2.11	28	3.11111	4
S26	CO_S	W_CO_S	W	Papaver somniferum	44	3	99	51	43	1.09	33	1.94118	4
S27	CO_S	W_CO_S	W	Abies procera	27	4	49	1	8	1.78	12.25	49	4
S41	CO_S	W_CO_S	W	Petunia sp.	25	6	93	58	26	1.4	15.5	1.60345	4
S42	CO_S	W_CO_S	W	Ulmus americana	28	1	90	1	10	3.18	90	90	4
S8	CO_S	W_CO_S	W	Crambe abyssinica	27	4	74	48	21	0.96	18.5	1.54167	4
W14	CO_W	W_CO_W	W	Brassica juncea	43.7	29	97	55	59	0.96	3.34483	1.76364	4
W17	CO_W	W_CO_W	W	Crambe abyssinica	34.5	92	86	43	21	1.25	0.934783	2	4
W28	CO_W	W_CO_W	W	Lagenaria siceraria	38.5	21	93	59	56	0.88	4.42857	1.57627	4
W29	CO_W	W_CO_W	W	Ricinus communis	37.3	174	86	24	26	1.66	0.494253	3.58333	4
W3	CO_W	W_CO_W	W	Carum carvi	42.7	1	76	40	32	0.84	76	1.9	4
W37	CO_W	W_CO_W	W	Onobrychis viciifolia	42.1	41	92	40	34	1.24	2.2439	2.3	4
W46	CO_W	W_CO_W	W	Allium ampeloprasum	43.2	10	95	55	32	0.93	9.5	1.72727	4
W48	CO_W	W_CO_W	W	Allium fistulosum	43	10	95	13	21	1.91	9.5	7.30769	4
W60	CO_W	W_CO_W	W	Agropyron fragile	41.8	14	89	55	37	0.81	6.35714	1.61818	4
W62	CO_W	W_CO_W	W	Bromus catharticus	41.8	35	97	20	23	1.84	2.77143	4.85	4
W66	CO_W	W_CO_W	W	Elymus trachycaulus	22	33	94	2	14	4.18	2.84848	47	4
W68	CO_W	W_CO_W	W	Eragrostis curvula	28.7	62	97	65	44	1.11	1.56452	1.49231	4
W88	CO_W	W_CO_W	W	Datura metel	36.9	17	91	26	14	1.76	5.35294	3.5	4
D13	CO_D	C_CO_D	C	Vicia sativa	24.16	131	91.94	84.12	84.93	0.32	0.701832	1.09296	5
D18	CO_D	C_CO_D	C	Phaseolus vulgaris	21.69	56	91.71	84.03	64.6	0.35	1.63768	1.0914	5
D19	CO_D	C_CO_D	C	Glycine max	23.87	306	91.87	80.56	57.27	0.47	0.300229	1.14039	5
D20	CO_D	C_CO_D	C	Brassica napus	21.72	44	94.72	85.31	55.93	0.43	2.15273	1.1103	5
D23	CO_D	C_CO_D	C	Linum usitatisimum	23.22	67	96.71	89.13	68.42	0.33	1.44343	1.08504	5
D24	CO_D	C_CO_D	C	Brassica oleracea	22.64	48	89	81.85	87	0.32	1.85417	1.08735	5
D25	CO_D	C_CO_D	C	Lactuca sativa	22.37	177	85.18	72.4	145.44	0.57	0.481243	1.17652	5
D27	CO_D	C_CO_D	C	Lycopersicon esculentum	23.51	63	92.5	84.04	48.76	0.36	1.46825	1.10067	5
D3	CO_D	C_CO_D	C	Secale cereale	23.48	35	94.57	83.68	55.85	0.46	2.702	1.13014	5
D4	CO_D	C_CO_D	C	Sorghum vulgare	24.13	99	91.39	83.63	82.67	0.32	0.923131	1.09279	5
D5	CO_D	C_CO_D	C	X Triticosecale	24	52	92	82.03	66.3	0.42	1.76923	1.12154	5
S1	CO_S	C_CO_S	C	Apium graveolens	26	2	90	76	75	0.54	45	1.18421	5
S11	CO_S	C_CO_S	C	Spinacia oleracea	27	5	97	86	102	0.41	19.4	1.12791	5
S19	CO_S	C_CO_S	C	Medicago sativa	26	4	89	70	55	0.73	22.25	1.27143	5
S3	CO_S	C_CO_S	C	Petroselinum crispum	26	2	89	73	58	0.62	44.5	1.21918	5
S4	CO_S	C_CO_S	C	Helianthus annuus	27	3	92	82	56	0.37	30.6667	1.12195	5
R10	CO_R	C_CO_R	C	Pisum sativum	50	3	98	75	130	0.46	32.6667	1.30667	5
R12	CO_R	C_CO_R	C	Beta vulgaris var. Cicla	47	4	98	66	58	0.68	24.5	1.48485	5
R14	CO_R	C_CO_R	C	Lycopersicon esculentum	57	5	98	76	124	0.39	19.6	1.28947	5
R4	CO_R	C_CO_R	C	Zea mays	47	5	98	69	65	0.62	19.6	1.42029	5
R8	CO_R	C_CO_R	C	Abelmoschus esculentus	47	5	98	66	125	0.68	19.6	1.48485	5
W20	CO_W	C_CO_W	C	Spinacia oleracea	64.7	51	92	53	73	0.6	1.80392	1.73585	5
W21	CO_W	C_CO_W	C	Citrullus lanatus	42.9	554	92	63	68	0.68	0.166065	1.46032	5
W22	CO_W	C_CO_W	C	Cucumis melo	68.8	814	92	53	66	0.57	0.113022	1.73585	5
W23	CO_W	C_CO_W	C	Cucumis sativus	68.7	162	94	61	87	0.48	0.580247	1.54098	5
W25	CO_W	C_CO_W	C	Cucurbita maxima	43.5	209	94	63	50	0.71	0.449761	1.49206	5
W26	CO_W	C_CO_W	C	Cucurbita moschata	43.7	70	94	75	86	0.43	1.34286	1.25333	5
W27	CO_W	C_CO_W	C	Cucurbita pepo	42.8	104	94	76	76	0.42	0.903846	1.23684	5
W36	CO_W	C_CO_W	C	Melilotus alba	42.5	13	89	65	63	0.56	6.84615	1.36923	5
W39	CO_W	C_CO_W	C	Pisum sativum	63.9	1068	95	70	97	0.39	0.0889513	1.35714	5
W44	CO_W	C_CO_W	C	Trifolium repens	43.5	261	91	71	77	0.46	0.348659	1.28169	5
W49	CO_W	C_CO_W	C	Linum usitatissimum	43.5	2038	93	64	53	0.67	0.045633	1.45312	5
W50	CO_W	C_CO_W	C	Abelmoschus esculentus	42	95	87	71	87	0.38	0.915789	1.22535	5
W52	CO_W	C_CO_W	C	Gossypium hirsutum	60.6	1395	95	60	115	0.58	0.0681004	1.58333	5
W61	CO_W	C_CO_W	C	Avena sativa	44.4	785	97	83	117	0.32	0.123567	1.16867	5
W64	CO_W	C_CO_W	C	Dactylis glomerata	43.8	317	88	61	65	0.62	0.277603	1.44262	5
W79	CO_W	C_CO_W	C	Poa pratensis	42.3	84	86	63	54	0.54	1.02381	1.36508	5
W82	CO_W	C_CO_W	C	Triticum aestivum	43.6	427	94	73	54	0.48	0.220141	1.28767	5
W87	CO_W	C_CO_W	C	Capsicum chinense	37.2	51	93	72	48	0.56	1.82353	1.29167	5
W90	CO_W	C_CO_W	C	Lycopersicon esculentum	80.6	3749	92	28	73	0.79	0.0245399	3.28571	5
D14	CO_D	W_CO_D	W	Lathyrus sativus	23.75	65	94.81	87.67	79	0.3	1.45862	1.08144	5
S18	CO_S	W_CO_S	W	Lotus corniculatus	26	3	84	70	52	0.54	28	1.2	5
S28	CO_S	W_CO_S	W	Eragrostis curvula	26	3	94	82	85	0.46	31.3333	1.14634	5
W24	CO_W	W_CO_W	W	Cucurbita argyrosperma	43.7	14	96	67	67	0.66	6.85714	1.43284	5
W32	CO_W	W_CO_W	W	Lathyrus odoratus	41.9	23	91	58	40	0.79	3.95652	1.56897	5
W34	CO_W	W_CO_W	W	Lotus corniculatus	42.3	224	92	69	68	0.54	0.410714	1.33333	5
W40	CO_W	W_CO_W	W	Trifolium alexandrinum	43.3	10	90	74	70	0.37	9	1.21622	5
W54	CO_W	W_CO_W	W	Hibiscus cannabinus	39.5	94	89	66	59	0.58	0.946809	1.34848	5
W56	CO_W	W_CO_W	W	Papaver somniferum	39	48	95	75	62	0.51	1.97917	1.26667	5
W58	CO_W	W_CO_W	W	Agropyron cristatum	38.8	75	92	77	65	0.39	1.22667	1.19481	5
W59	CO_W	W_CO_W	W	Agropyron desertorum	40.3	20	90	63	45	0.67	4.5	1.42857	5
W69	CO_W	W_CO_W	W	Eragrostis tef (abyssinica)	16.7	22	96	91	66	0.3	4.36364	1.05495	5
W7	CO_W	W_CO_W	W	Carthamus tinctorius	40.7	1049	87	69	88	0.44	0.0829361	1.26087	5
W75	CO_W	W_CO_W	W	Lolium rigidum	36.9	13	87	75	82	0.33	6.69231	1.16	5
W8	CO_W	W_CO_W	W	Cichorium endive	43.2	17	91	63	55	0.65	5.35294	1.44444	5
W89	CO_W	W_CO_W	W	Datura stramonium	36.8	142	94	82	104	0.33	0.661972	1.14634	5
D11	CO_D	C_CO_D	C	Festuca arundinacea	22.97	34	92.3	89.52	76.61	0.12	2.71471	1.03105	8
D17	CO_D	C_CO_D	C	Lens esculenta	23.62	56	95.25	90.03	98.38	0.22	1.70089	1.05798	8
D21	CO_D	C_CO_D	C	Helianthus annuus	23.07	53	91.92	90.54	72.15	0.06	1.73434	1.01524	8
D26	CO_D	C_CO_D	C	Cucumis sativus	22.91	68	99.26	97.94	72.53	0.06	1.45971	1.01348	8
D9	CO_D	C_CO_D	C	Dacylis glomerata	22.78	55	83.81	78.4	114	0.24	1.52382	1.06901	8
S10	CO_S	C_CO_S	C	Beta vulgaris	26	10	91	87	88	0.15	9.1	1.04598	8
S2	CO_S	C_CO_S	C	Daucus carota	26	19	86	79	79	0.27	4.52632	1.08861	8
S23	CO_S	C_CO_S	C	Trifolium repens	25	3	87	84	57	0.12	29	1.03571	8
W35	CO_W	C_CO_W	C	Medicago sativa	49.8	423	92	80	93	0.24	0.217494	1.15	8
W72	CO_W	C_CO_W	C	Hordeum vulgare	44.4	941	97	86	84	0.25	0.103082	1.12791	8
S15	CO_S	W_CO_S	W	Astragalus sp.	27	3	93	88	81	0.19	31	1.05682	8
D12	CO_D	C_CO_D	C	Vicia faba	21.94	57	95.68	92.45	144.25	0.15	1.6786	1.03494	9
D15	CO_D	C_CO_D	C	Cicer arietinum	23.91	37	94.48	91.72	169.33	0.12	2.55351	1.03009	9
D28	CO_D	C_CO_D	C	Capsicum annuum	21.43	30	90.66	87.13	132.72	0.16	3.022	1.04051	9
D6	CO_D	C_CO_D	C	Zea mays	23.49	364	94.6	91.19	141	0.15	0.25989	1.03739	9
D8	CO_D	C_CO_D	C	Triticum durum	27.29	389	95.37	92.58	186	0.1	0.245167	1.03014	9
S14	CO_S	C_CO_S	C	Cucumis sativa	27	7	97	93	199	0.15	13.8571	1.04301	9
S24	CO_S	C_CO_S	C	Vicia sp	26	3	94	91	133	0.12	31.3333	1.03297	9
S34	CO_S	C_CO_S	C	Poa pratensis	26	3	90	87	154	0.12	30	1.03448	9
S35	CO_S	C_CO_S	C	Sorghum bicolor	26	7	97	90	125	0.27	13.8571	1.07778	9
S39	CO_S	C_CO_S	C	Lycopersicon esculentum	26	6	92	89	130	0.12	15.3333	1.03371	9
W51	CO_W	C_CO_W	C	Gossypium barbadense	41.6	197	97	87	141	0.24	0.492386	1.11494	9
W41	CO_W	W_CO_W	W	Trifolium fragiferum	43.7	59	93	90	196	0.07	1.57627	1.03333	9
W67	CO_W	W_CO_W	W	Elymus transhyrcanus	30.4	24	89	86	178	0.1	3.70833	1.03488	9
D10	CO_D	C_CO_D	C	Bromus inermis	21.13	37	89.83	87.83	323.5	0.09	2.42784	1.02277	10
D22	CO_D	C_CO_D	C	Nicotiana tabacum	21.82	117	97.02	90.76	476	0.29	0.829231	1.06897	10
S12	CO_S	C_CO_S	C	Citrullus lanatus	27	5	98	95	318	0.11	19.6	1.03158	10
S13	CO_S	C_CO_S	C	Cucumis melo	27	7	95	91	224	0.15	13.5714	1.04396	10
S40	CO_S	C_CO_S	C	Nicotiana tabacum	25	4	95	89	81	0.24	23.75	1.06742	10
S9	CO_S	C_CO_S	C	Raphanus sativus	27	8	99	97	497	0.07	12.375	1.02062	10
W18	CO_W	C_CO_W	C	Raphanus sativus	43.9	70	97	85	120	0.27	1.38571	1.14118	10
W33	CO_W	C_CO_W	C	Lens culinaris	34.8	1727	95	91	365	0.11	0.0550087	1.04396	10
W55	CO_W	W_CO_W	W	Hibiscus sabdariffa	39.5	46	83	78	385	0.13	1.80435	1.0641	10
D1	CO_D	C_CO_D	C	Avena sativa	23.12	457	95.76	95.28	880	0.02	0.20954	1.00504	11
D2	CO_D	C_CO_D	C	Hordeum vulgare	22.78	1195	93.22	91.99	502.7	0.05	0.0780084	1.01337	11
D7	CO_D	C_CO_D	C	Triticum aestivum	23.03	1547	95.51	94.97	847	0.02	0.0617388	1.00569	11
S21	CO_S	C_CO_S	C	Phaseolus vulgaris	26	3	93	96	307	-0.12	31	0.96875	11
S37	CO_S	C_CO_S	C	Zea mays	26	1	99	98	263	0.04	99	1.0102	11
W45	CO_W	C_CO_W	C	Vigna radiata	40.5	181	93	92	457	0.02	0.513812	1.01087	11
W65	CO_W	C_CO_W	C	Eleusine coracana	29.8	658	87	87	437	0	0.132219	1	11
